# Supplementary material for: Antitumor Efficacy of Dual Blockade with Encorafenib + Cetuximab in Combination with Chemotherapy in Human BRAFV600E-Mutant Colorectal Cancer
Source: PubMed Central journal article supplement — Clin Cancer Res. 2023 Apr 11;29(12):2299–309. doi: 10.1158/1078-0432.CCR-22-3894 (PMC10261917; doi:10.1158/1078-0432.ccr-22-3894), 2023-04-11
Supplement: ccr-22-3894_supplementary_figure_1_suppfs1.pdf [file ccr-22-3894_supplementary_figure_1_suppfs1.pdf]

**Supplementary Figure 1**

**B1003b Hallmark padj<0.05**

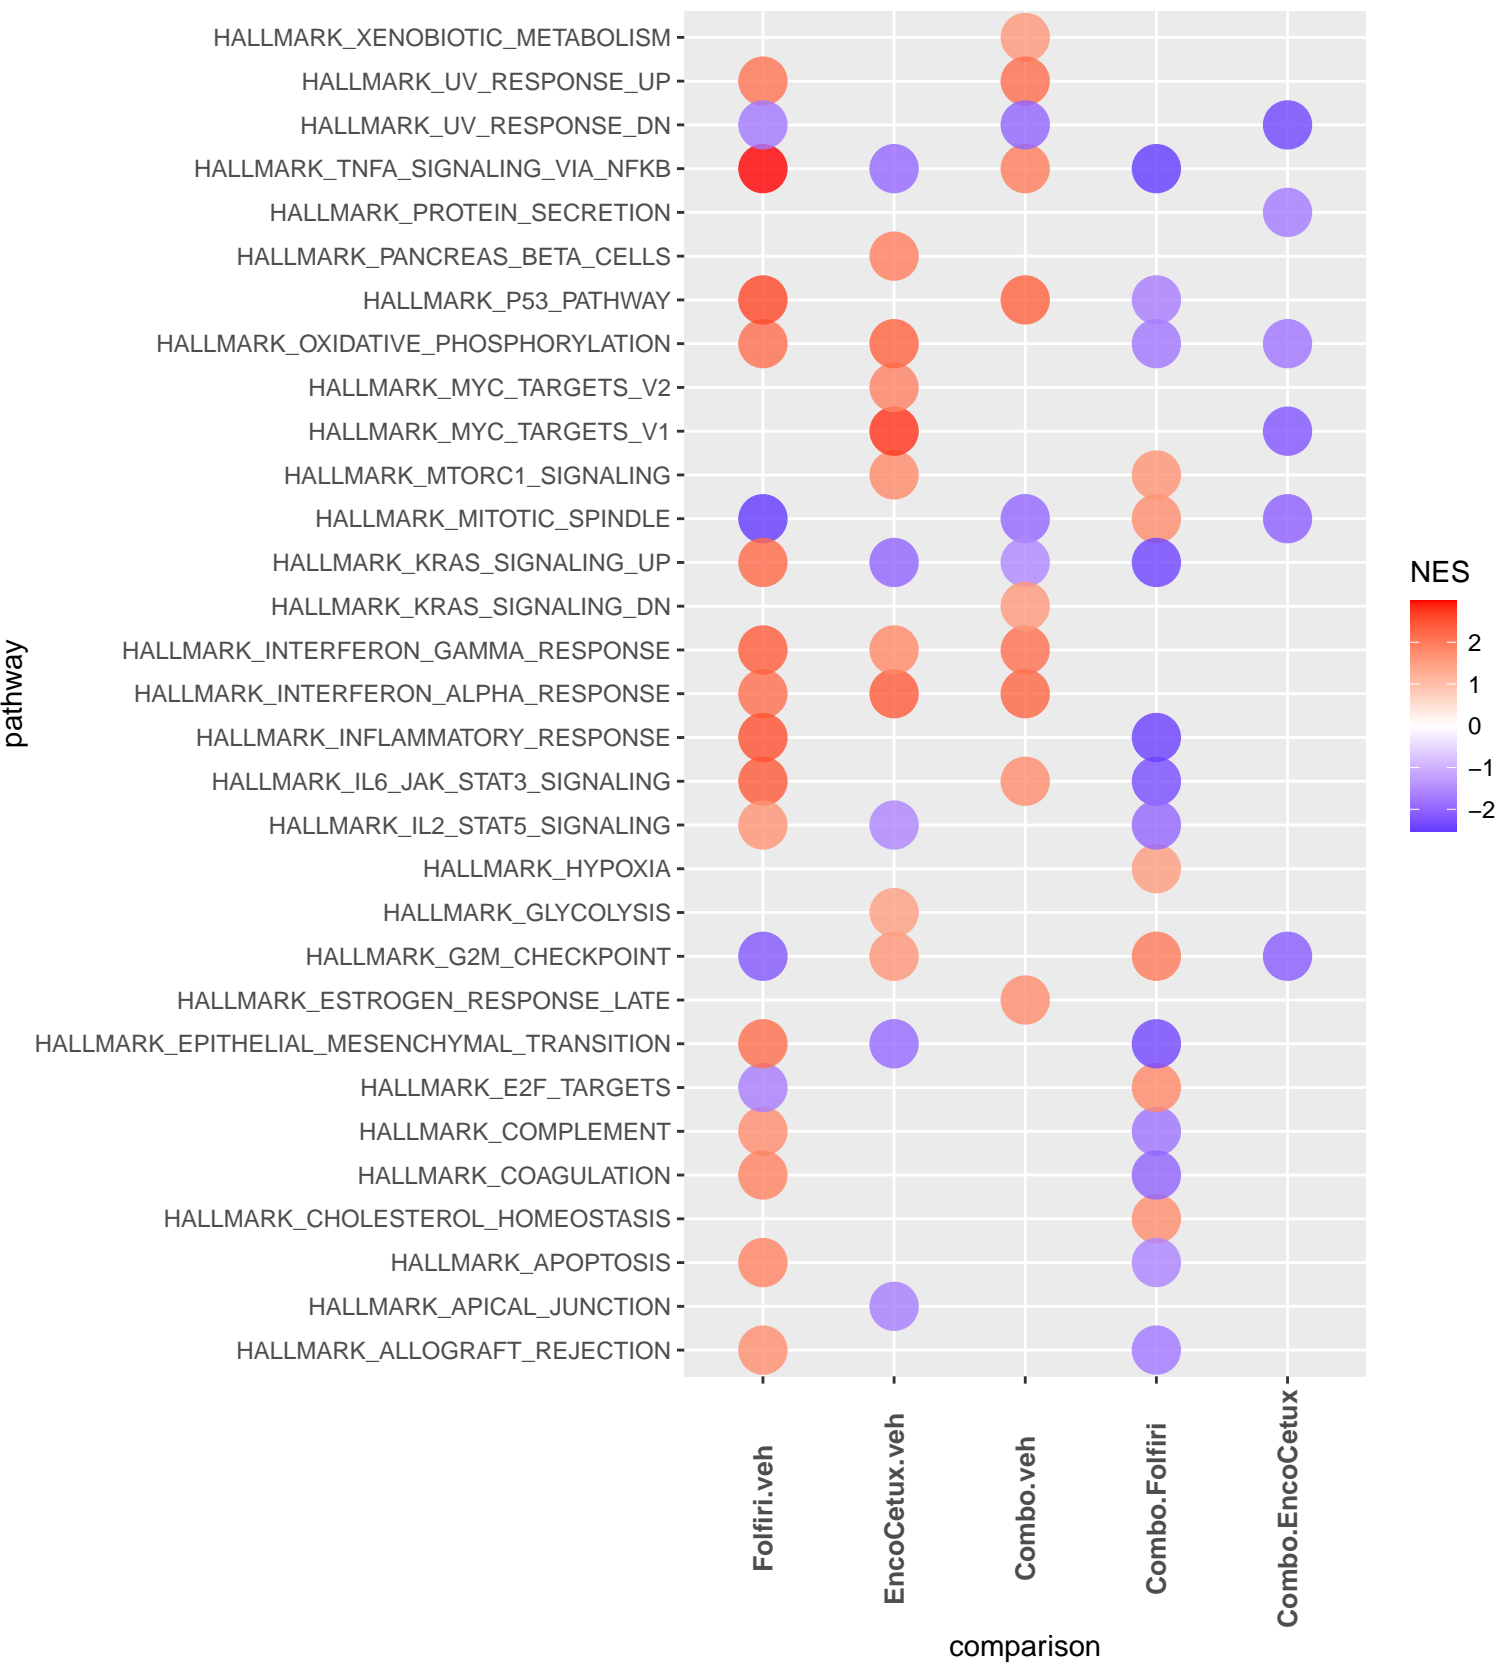

Differentially enriched hallmark gene sets after cytotoxic chemotherapy and targeted therapy of B1003b PDX tumor samples.
